1 **Carbon starvation induces the expression of PprB-regulated**  
2 **genes in *Pseudomonas aeruginosa***

3

4 Congcong Wang,<sup>a</sup> Wenhui Chen,<sup>b</sup> Aiguo Xia,<sup>b,c</sup> Rongrong Zhang,<sup>b,c</sup> Yajia Huang,<sup>c</sup>  
5 Shuai Yang,<sup>b,c</sup> Lei Ni,<sup>b,c,#</sup> and Fan Jin,<sup>b,c,#</sup>

6

7 a. Department of Chemical Physics, University of Science and Technology of China,  
8 No. 96, JinZhai Road Baohe District, Hefei, Anhui 230026, P. R. China

9 b. Hefei National Laboratory for Physical Sciences at the Microscale, University of  
10 Science and Technology of China, No. 96, JinZhai Road Baohe District, Hefei,  
11 Anhui 230026, P. R. China

12 c. Institute of Synthetic Biology, Shenzhen Institutes of Advanced Technology,  
13 Chinese Academy of Sciences, Shenzhen 518055, China

14

15 Congcong Wang and Wenhui Chen contributed equally to this article.

16

17 #, Address correspondence to Lei Ni, [nilei@mail.ustc.edu.cn](mailto:nilei@mail.ustc.edu.cn), or Fan Jin,  
18 [fjinustc@ustc.edu.cn](mailto:fjinustc@ustc.edu.cn).

19

20

21

22

23 **ABSTRACT**

24

25 *Pseudomonas aeruginosa* can cause severe infections in humans. This bacteria often  
26 adopt a biofilm lifestyle that is hard to treat. In several previous studies, the  
27 PprA-PprB two-component system (TCS), which controls the expression of type IVb  
28 pili, BapA adhesin, and CupE fimbriae, was shown to be involved in biofilm  
29 formation. However, signals or environmental conditions that can trigger the  
30 PprA-PprB TCS are still unknown, and the molecular mechanisms of PprB-mediated  
31 biofilm formation are poorly characterized. Here we report that carbon starvation  
32 stress (CCS) can induce the expression of *pprB* and genes in the PprB regulon. The  
33 stress response sigma factor RpoS, rather than the two-component sensor PprA, was  
34 determined to mediate the induction of *pprB* transcription. We also observed a strong  
35 negative regulation of PprB to the transcription of itself. Further experiments showed  
36 that PprB overexpression greatly enhanced cell-cell adhesion (CCA) and cell-surface  
37 adhesion (CSA) in *P. aeruginosa*. Specially, under the background of PprB  
38 overexpression, both of the BapA adhesin and CupE fimbriae displayed positive effect  
39 on CCA and CSA, while the type IVb pili showed an unexpected negative effect on  
40 CCA and no effect on CSA. In addition, expression of the PprB regulon genes  
41 displayed significant increases in 3-day colony biofilms, indicating a possible carbon  
42 limitation state in these biofilms. The CSS-RpoS-PprB-Bap/Flp/CupE/Tad pathway  
43 identified in this study provides a new perspective on the process of biofilm formation  
44 under carbon-limited environments.

45 **IMPORTANCE**

46

47 Typically, determining the external signals that can trigger a regulatory system is  
48 crucial to understand the regulatory logic and inward function of that system. The  
49 PprA-PprB two-component system was reported to be involved in biofilm formation  
50 in *Pseudomonas aeruginosa*, but the signals that can trigger this system are unknown.  
51 In this study, we found that carbon starvation stress (CSS) can induce the transcription  
52 of *pprB* and genes in PprB regulon, through an RpoS dependent pathway. Increase of  
53 PprB expression leads to enhanced cell-cell and cell-surface adhesions in *P.*  
54 *aeruginosa*, both of which are dependent mainly on the Bap adhesin secretion system  
55 and partially on the CupE fimbriae. Our findings suggest that PprB reinforces the  
56 structure of biofilms under carbon-limited conditions, and the Bap secretion system  
57 and CupE fimbriae are two potential targets for biofilm treatment.

58

59 **KEYWORDS**

60 *Pseudomonas aeruginosa*, carbon starvation stress, biofilm formation, PprB

61

62

63

64

65

66

67 *Pseudomonas aeruginosa* is a ubiquitous opportunistic pathogen responsible for many  
68 human infections, especially the cystic fibrosis found in some immunocompromised  
69 individuals (1-3). In most cases of chronic infections, bacteria live in biofilm  
70 communities, and increasingly, they are becoming resistant to human immunity and  
71 antibiotic treatments (4-11). Cells in biofilms are typically embedded within a  
72 self-produced matrix of extracellular polymeric substances (EPSs) containing  
73 polysaccharides, proteins, lipids, and nucleic acids (12-16). Due to its key role in  
74 protecting the interior of the community from being killed by antibiotics or immune  
75 cells, the dense extracellular matrix has attracted substantial attentions. Numerous  
76 studies have pointed out the importance of two extracellular polysaccharides, Pel and  
77 Psl, in maintaining functional biofilm structures in *P. aeruginosa* (17-21). Whereas  
78 one previous research had identified a hyper-biofilm phenotype that was independent  
79 of Pel and Psl (22). Cells in this biofilm have been characterized by PprB  
80 overexpression, decreased Type III secretion, and increased drug susceptibility (22).  
81 PprB is a two-component response regulator that controls the transcription of  
82 numerous genes in *P. aeruginosa* (22, 23). Moreover, the *pprB* mutant strain has  
83 recently been reported to form a compromised biofilm in microfluidics systems (24).  
84 These preliminary results demonstrate that PprB and its downstream regulated  
85 proteins can dominate the formation of a new type of biofilm.

86 The PprB regulon contains multiple open reading frames, including genes  
87 encoding for type I secretion system substrates (*bapA-bapD*), CupE CU fimbriae, and  
88 type IVb pili, all of which are positively and directly regulated by PprB at the

89 transcriptional level (22). The predetermined *bapA*, *bapB*, *bapC*, and *bapD*  
90 (*PA1874-1877*) genes consist of an operon in which *bapA* encodes a large externalized  
91 repeat-rich protein considered to be an adhesin. In addition, BapA protein was found  
92 mainly in the classical supernatant of bacterial culture and associated loosely with the  
93 cell surface (22). This raises the confusion about whether BapA can enhance cell  
94 adhesion to surfaces. Meanwhile, the CupE fimbriae is a cell-surface-associated  
95 organelle that plays an important role in both the microcolony and 3D mushroom  
96 formations during biofilm development (25). The type IVb pili is referred to as the  
97 tight adherence (Tad) pili and is important in bronchial epithelial cell adhesion and  
98 host-colonization (26, 27). In *P. aeruginosa*, the Flp pilin consists of the main  
99 structure of the type IVb pili fibre and the *tad* locus proteins (RcpC-TadG) are  
100 responsible for ordered secretion, folding and the assembly of tens of thousands  
101 of pilin subunits (28). Previous study had revealed that BapA adhesin, CupE fimbriae  
102 and type IVb pili together contribute to the aforementioned hyper-biofilm phenotype  
103 (22).

104 The phenotypes of PprB overexpression in *P. aeruginosa* have been well  
105 documented. However, in the wild type strain, the exact external signals or  
106 environmental conditions that trigger the PprB pathway remain unknown.  
107 Transcriptional studies of *flp*, *rcpC* and *cupE* promoters in shaking conditions have  
108 indicated that all of these genes are commonly induced after cells entered the  
109 stationary phase (25, 26). In this study, we demonstrated that carbon starvation stress  
110 (CSS) can trigger the expression of multiple PprB-regulated genes in *P. aeruginosa*.

111 The induction of PprB-regulated genes is dependent on the RpoS-controlled  
112 overexpression of PprB, rather than on the signal transduction of the putative sensor  
113 kinase PprA. We further demonstrated the roles of type IVb pili, CupE fimbriae and  
114 BapA adhesin in the cell-cell adhesion (CCA) and cell-surface adhesion (CSA) of *P.*  
115 *aeruginosa*. We also observed significant transcriptional increases in PprB regulon  
116 genes in colony biofilms after 3 days of cultivation. The  
117 CSS-RpoS-PprB-BapA/Flp/CupE signaling pathway determined in this study  
118 provides a new perspective on the process of biofilm formation and may be helpful in  
119 directing biofilm treatment.

120

## 121 **Results**

122 ***flp* transcription is induced under CSS.** Using the super-folder green fluorescent  
123 protein (sfGFP), a reporter expression system (see Materials and Methods) was  
124 established to assess the transcriptional activity of *flp* promoter. The reporter strain  
125 was first cultured to exponential phase using sodium succinate as the sole carbon  
126 source. Then cells were washed and introduced to the same media without sodium  
127 succinate. *flp* expression responded quickly to carbon deprivation, with great  
128 heterogeneity between cells (Fig. 1A). The fluorescence showed an approximately  
129 50-fold ( $P < 0.001$ ) induction after 5 hours of carbon deprivation (Fig. 1B). To test  
130 whether carbon limitation is the only inducement for the induction of *flp* transcription,  
131 a bacterial culture that had already experienced 4 hours of carbon deprivation was  
132 supplemented with 30 mM sodium succinate. SfGFP fluorescence decreased quickly

133 upon succinate addition, and the half-life period (1 hour) of this decay was  
134 approximately the doubling time of cells, indicating that gene transcription had halted  
135 immediately (Fig. 1B). Furthermore, *flp* transcription showed similar inductions when  
136 we replaced sodium succinate with other types of carbon sources and repeated the  
137 carbon deprivation experiment (Fig. 1C). All these results indicate that CSS can  
138 induce *flp* transcription in *P. aeruginosa*.

139

140 **PprB is essential for the CSS response of *flp* transcription.** We next investigated  
141 the potential regulators involved in the transcription of *flp* under CSS. Previously, *flp*  
142 transcription was reported to be mainly dependent on the PprA-PprB two-component  
143 regulatory system (26). Moreover, the carbon catabolite control system  
144 CbrAB-Crc-CrcZ in *P. aeruginosa* were found to be involved in the hierarchical  
145 management of carbon sources through regulation of gene expressions at both the  
146 transcriptional and translational level (29, 30). In addition, a LasR binding site had  
147 been predicted upstream of the *flp* coding sequence, suggesting that the quorum  
148 sensing system may also be involved in the control of *flp* transcription. We thus  
149 monitored the expression of *flp* reporter in *pprB*, *cbrAcbrB* and *lasRrhlR* mutant  
150 strains before and after carbon deprivation. *flp* expression in the *pprB* mutant  
151 completely lost the ability to respond to CSS, while in *cbrAB* and *lasRrhlR* mutants it  
152 displayed similar responses upon CSS to that of the wild type strain (Fig. 2A). Thus  
153 we concluded that PprB is essential for the CSS-induced expression of *flp*.

154

155 **Transcription of *cupE* and *tad* locus are also induced under CSS and are**  
156 **PprB-dependent.** Expression of two gene clusters, the *tad* locus encoding proteins  
157 required for type IVb pili assembly and the *cupE* locus encoding non-archetypal  
158 fimbrial subunits, are both controlled by PprB through direct transcriptional  
159 regulation (25, 26). We speculated that expressions of these two genetic loci are also  
160 upregulated under CSS. The fluorescent intensities of transcriptional reporters for  
161 *cupE* and *rcpC* were monitored in both wild type and *pprB* mutant strains. Consistent  
162 with our speculation, expression of *cupE* and *rcpC* showed 9- ( $P < 0.001$ ) and 14- ( $P <$   
163  $0.001$ ) fold increase after carbon deprivation, the knockout of *pprB* eliminated the  
164 CSS response of *rcpC* and reduced the CSS response of *cupE* to 2 fold ( $P < 0.001$ )  
165 (Fig. 2B).

166 The PprB regulon had been previously determined (22), including genes  
167 involved in *Pseudomonas* quinolone signal (PQS) systems, type 1 secretion systems  
168 containing *bapA*, *bapB*, *bapC*, and *bapD* and the aforementioned type IVb pili and  
169 CupE fimbriae assembly systems. We further checked the responses of other  
170 PprB-regulated genes under CSS using RNAseq. Most of the genes within the PprB  
171 regulon were upregulated after 6 hours of carbon deprivation, with a fold change from  
172 2 to nearly 100 (Fig. 2C). Therefore, the PprA-PprB two-component system was  
173 determined to be a key node during CSS response in *P. aeruginosa*.

174

175 **Increased expression of PprB under CSS contributes primarily to the**  
176 **transcriptional induction of PprB regulated genes.** We then focused on the



177 question of how the PprA-PprB system responds to CSS. In one previous study, PprA  
178 was thought to act as a sensor kinase, which is responsible for PprB phosphorylation  
179 after responding to external signals (23). Thus we naturally considered that the CSS  
180 signal should be transmitted through PprA. However, reporters in *pprA* mutant  
181 exhibited similar responses to CSS compared with those in the wild type strain (Fig.  
182 3A, Fig. 3D). Therefore, although PprB dominates the transcriptional induction of  
183 related genes, CSS signal is not transmitted through PprA. Another possibility is that  
184 the CSS signal may trigger the expression of *pprB* (which was already observed in the  
185 RNAseq result), thereby up-regulating the expression of related genes. We further  
186 constructed a *pprB* transcriptional reporter in *P. aeruginosa* and investigated its  
187 response to CSS. Consistent with the RNAseq data, the fluorescence of the *pprB*  
188 reporter in wild type cells displayed approximately 10-fold increase ( $P < 0.001$ ) upon  
189 5 hours of carbon starvation (Fig. 3B).

190 To further check whether the transcriptional inductions of PprB regulated genes  
191 under CSS could be explained by the increase of PprB expression, reporters of *flp*,  
192 *cupE*, and *rcpC* were measured in a PApprB1 strain in which *pprB* was constitutively  
193 overexpressed. This PApprB1 strain was constructed by introducing the *pprB* gene  
194 into the chromosomal attTn7 site of the *pprB* knockout strain. Notably, the  
195 exogenously introduced *pprB* gene was driven by the arabinose inducible promoter  
196 P<sub>BAD</sub>. Expressions of the reporters at logarithmic phase increased more than ten folds  
197 in PApprB1 compared to that in wild type (Fig. 2B, Fig. 3C), consistent with the fact  
198 that PprB positively controls the transcription of these genes. However, CSS failed to

199 induce the same expression changes of *flp*, *cupE* and *rcpC* in PApprB1. Only 3- ( $P <$   
200 0.05), 1.5- ( $P < 0.01$ ), and 0-fold increase for *flp*, *cupE* and *rcpC* were observed in  
201 PApprB1 (Fig. 3C, Fig. 3D), in contrast to the corresponding 50- ( $P < 0.001$ ), 9- ( $P <$   
202 0.001) and 14-fold ( $P < 0.001$ ) increase in PAO1 (Fig. 3D). Therefore, we concluded  
203 that the transcriptional inductions of *cupE*, *rcpC* and *flp* under CSS are primarily  
204 driven by the increased expression of PprB.

205

206 **Increased expression of PprB under CSS is controlled by RpoS.** We then  
207 continued to search for the regulators that control the expression of PprB. In *P.*  
208 *aeruginosa*, the stress response sigma factor RpoS has been reported to enhance  
209 carbon starvation tolerance of bacteria (31, 32), thus, it is reasonable to speculate that  
210 RpoS is involved in the regulation of genes with altered expressions during CSS. In  
211 the *rpoS* mutant, Sfgfp fluorescence for *pprB* transcriptional reporter was barely  
212 detectable under CSS, complementing the *rpoS* mutation in PArpoS restored Sfgfp  
213 fluorescence (Fig. 4B), indicating the pivotal role that RpoS plays for *pprB*  
214 transcription. Based on the previously identified RpoS-dependent promoter consensus  
215 (33), a putative RpoS binding site (CTATATG) was mapped in the *pprB* promoter  
216 sequence (Fig. 4A). The *PpprB-mut1* reporter, whose RpoS binding site was mutated  
217 (CTATATG to GGGTATG), also failed to respond to CSS in the wild type strain (Fig.  
218 4B). We also monitored the expression of *pprB* under the treatment of nitrogen  
219 starvation or acetate stress in which the RpoS activity could also be induced (34, 35),  
220 over 10-fold (nitrogen starvation,  $P < 0.001$ ) and 12-fold (acetate stress,  $P < 0.001$ )

221 increase were observed (Fig. 4C). These results strongly suggest that RpoS directly  
222 regulates the transcription of *pprB* and mediates the CSS response on *pprB*  
223 expression.

224 Expressions of *flp*, *cupE* and *rcpC* were further examined in strain PApprB2, in  
225 which *rpoS* was knocked out and *pprB* was overexpressed by the P<sub>BAD</sub> promoter. All  
226 the three reporters in the PApprB2 strain displayed decreased expression with respect  
227 to that in PApprB1, especially under CSS, and the transcriptional induction of *flp* and  
228 *cupE* found in PApprB1 under CSS are completely abrogated (Fig. 4D). We also  
229 mapped several putative RpoS binding sequences within *flp*, *cupE*, and *rcpC*  
230 promoters (Fig. 4E). These results suggest that RpoS can also control the transcription  
231 of PprB-regulated genes in a PprB independent way, possibly through directly acting  
232 as sigma factors during transcriptional initiation.

233

234 **PprB overexpression enhances CCA in *P. aeruginosa*.** We next investigated the  
235 possible effects of *pprB* upregulation on the physiology of *P. aeruginosa*.  
236 Overexpression of PprB was reported to result in a hyper-biofilm phenotype that was  
237 dependent on type IVb pili, the CupE fimbriae and the BapA adhesin (PA1874), but  
238 the exact mechanism by which this occurs remains unclear (22). During biofilm  
239 formation in flow chambers, bacteria are engaged in a dynamic process of growth and  
240 detachment, and the rate of bacterial growth and detachment within a biofilm are the  
241 two key factors that determine the resultant biomass. As the growth of *pprB*  
242 overexpression strain did not show any advantages to the wild type strain (Fig. S1),

243 we speculated that the hyper biomass phenotype may be due to an enhanced  
244 cell-to-cell or cell-to-surface adhesion, both of which are thought to reduce the rate of  
245 detachment.

246 The CCA of bacteria was simply estimated by observing the formation of  
247 bacterial aggregates in shaking cultures at the logarithmic phase. Both the mean size  
248 and number of bacterial aggregates in the PprB overexpression strain are about twice  
249 that of wild type strain (Fig. 5A, Fig. 5B). Additionally, the established bacterial  
250 aggregates dispersed completely after a 30-min incubation with proteinase K at 37 °C  
251 (Fig. 5A). Thus, CCA was enhanced in the PprB overexpression strain, and the PprB  
252 regulated proteins may directly contribute to CCA. CCAs were then monitored in *flp*,  
253 *cupE*, and *bap* mutants under the background of PprB overexpression. The mean size  
254 of bacterial aggregates in these mutants displayed small differences from that in the  
255 wild type strain (Fig. 5C, grey bar). Whereas bacterial aggregates differ between  
256 strains in high-size regions, according to their size distribution curves (Fig. 5B). We  
257 counted the number of large aggregates whose size were bigger than 50 μm and  
258 determined that formation of large bacterial aggregates under a PprB overexpression  
259 background were, compared with wild type, (i) increased by 43% ( $P < 0.01$ ) in the *flp*  
260 mutant, and (ii) reduced by 33% ( $P < 0.01$ ) and 74% ( $P < 0.001$ ) in the *cupE* and *bap*  
261 mutants, respectively (Fig. 5C). These results demonstrate that the Bap adhesin  
262 secretion system and CupE fimbriae are partially contribute to CCA, while the type  
263 IVb pili has a negative effect on CCA.

264 Interestingly, cell clustering could only be observed when arabinose was added at

265 the very start of bacteria inoculation. When arabinose was added at the logarithmic  
266 phase ( $OD_{600} \sim 0.5$ ), few clusters could be seen, and we also could not observe any  
267 clusters during the carbon deprivation experiment (in which cells can hardly grow).  
268 This phenomenon suggests that there is a currently unknown relationship between  
269 bacteria clustering and cell division.

270

271 **PprB overexpression enhances CSA in *P. aeruginosa*.** The CSA of bacteria was  
272 measured using a microfluidic device. Bacterial cultures were injected into the device  
273 and stood for 20 minutes to enable initial adhesion. Then, we directly washed the  
274 microfluidic channel with shear stress of 70 Pa for 5 minutes, number of cells on the  
275 surface before and after shear stress were counted. The effect of *pprB* overexpression  
276 on CSA was investigated first. All strains were grown to the logarithmic phase before  
277 being injected to microfluidic channels. Fluidic shear eliminated most of the adhered  
278 cells in the wild type strain. By contrast, cells with PprB overexpression appeared to  
279 be largely unaffected, with only several cells with incomplete adhesion being  
280 eliminated (Fig. 6A), the remaining cells persisted sticking to the surface even when  
281 shear stress was increased to 1000 Pa. Under PprB overexpression background,  
282 fraction of remained cells after shear stress were, compared to wild type: (i) not  
283 changed in *flp* mutant; (ii) reduced by 27% ( $P < 0.05$ ) and 79% ( $P < 0.001$ ) in *cupE*  
284 and *bap* mutants respectively (Fig. 6B). Thus both the CupE fimbriae and the Bap  
285 secretion systems are involved in the enhanced CSA of the PprB overexpression  
286 strain.

287 We further monitored the CSA of the wild type and *pprB* mutant cells before and  
288 after carbon deprivation. As expected, the fraction of remaining cells in the wild type  
289 strain showed 4-fold ( $P < 0.001$ ) increase upon CSS, in contrast to the 50% ( $P < 0.01$ )  
290 increase observed in the cells of the *pprB* mutant (Fig. 6C). Taken together, our results  
291 confirm that PprB overexpression can enhance bacterial CCA and CSA, which  
292 probably leads to the hyper biofilm phenotype.

293 Interestingly, although the type IVb pili is essential for the formation of the  
294 previously reported hyper-biofilm phenotype, this organelle showed no contribution  
295 to bacterial CSA (Fig. 6B) and showed a negative effect on bacterial CCA (Fig. 5C).  
296 The function of type IVb pili in biofilm formation remains unclear at this time.

297

298 **PprB negatively regulates the transcription of itself.** Many transcriptional  
299 regulators in bacteria exhibit self-regulation activities, either positive or negative.  
300 PprB was reported to bind to the *pprB* promoter region(25), in which a putative PprB  
301 binding site (GGCTAATAC) was mapped based on a previously predicted PprB  
302 recognition consensus (Fig. 4A). The PprB binding site stands immediately  
303 downstream of the aforementioned RpoS site, suggesting a negative effect of PprB on  
304 *pprB* transcription due to the steric interaction between PprB and RNA polymerase.  
305 To verify this assumption, we measured the fluorescence of the *pprB* reporter during  
306 logarithmic phase or under carbon deprivation conditions in both the *pprB* mutant and  
307 overproducing strains. Under CSS, the activity of the *pprB* reporter in the *pprB*  
308 mutant strain is similar to that in the wild type strain, while in PApprB1 cells it was 20%

309 (P < 0.001) of that in the wild type strain (Fig. 7A). Moreover, the expression of  
310 *PpprB-mut2* reporter whose PprB binding site was mutated (GGCTAATAC to  
311 GGCGGGTAC) was measured in the wild type and PApprB1 strains. In response to  
312 CSS, *PpprB-mut2* reporter in PApprB1 displayed 4-fold increase (P < 0.01), similar to  
313 the 5.5-fold increase (P < 0.01) found in the wild type strain (Fig. 7A). All these  
314 results confirm that *pprB* transcription is under a direct negative control of PprB. The  
315 model of CSS responses of PprB regulated genes through RpoS is presented (Fig.  
316 7B).

317

## 318 Discussion

319 The PprA-PprB two-component system has been studied for over 10 years, and  
320 PprB regulon containing multiple functional gene clusters was characterized several  
321 years ago. As it comes to the physiological role of PprB in bacteria, previous studies  
322 have mainly focused on the phenotypes of the *pprB* overexpression strain, which,  
323 compared with the wild type strain, have shown increased cell membrane  
324 permeability and aminoglycosides sensitivity, decreased cellular cytotoxicity and  
325 virulence in flies, and better biofilm formation (22, 23). However, very few results  
326 have been presented about the phenotypes of the *pprB* mutant strain, except one  
327 recent study that observed a compromised biofilm in this strain (24). The lack of  
328 knowledge about phenotypes of the *pprB* mutant is partially due to the fact that the  
329 signals and environmental conditions that may trigger the PprA-PprB system remain  
330 unclear. Generally, determining the external signals that can trigger a regulatory

331 system is crucial to understand the regulatory logic and inward function of that system.  
332 In this paper, we provide evidence that the PprB-regulated genes could be induced via  
333 CSS. In particular, the induction of PprB regulated genes is dependent on the  
334 increased expression of PprB, rather than on the activation of the PprA kinase. We  
335 further demonstrate that the stress response sigma factor RpoS controls the induction  
336 of *pprB* transcription.

337 In many organisms, the small-molecule alarmone (p)ppGpp is the main effector  
338 of the stress response that takes place during starvation (36). The (p)ppGpp Synthases  
339 RelA can sense the inability of tRNA aminoacylation during carbon starvation and  
340 translate the carbon starvation signal to the synthesis of intracellular (p)ppGpp (37).  
341 RelA-dependent (p)ppGpp accumulation was also demonstrated in *S. suis* under CSS  
342 (38). In *E. coli*, (p)ppGpp positively affects the intracellular level and function of  
343 RpoS through the multifaceted regulation of transcription, translation, proteolysis, and  
344 activity (39), thereby tying the CSS signal to the response of the RpoS regulon. As  
345 most of the genes in the (p)ppGpp-RpoS system of *E. coli* can also be found in the *P.*  
346 *aeruginosa* genome, it is possible that the RpoS-dependent *pprB* transcriptional  
347 response observed in this study was achieved through the same (p)ppGpp-RelA  
348 stress-sensing mechanism. In addition, CSS is not the only signal that can induce  
349 PprB expression. Nitrogen starvation stress and acetate stress, two other signals that  
350 can trigger the RpoS stress-response system, also induce the transcription of *pprB*  
351 (Fig. 4C). Thus, signals facilitating the accumulation of intracellular RpoS are  
352 probably the signals that can activate the expression of PprB and PprB-regulated



353 genes.

354 PprA was previously reported to be the cognate kinase for PprB (23). However,  
355 PprB is still active in the *pprA* mutant strain, according to the fact that *pprA* knockout  
356 failed to eliminate or reduce the CSS response of PprB-regulated genes. One reason  
357 could be that the regulatory activity of PprB is independent of PprB phosphorylation.  
358 This is contrary to our knowledge of two-component systems (40-42), thus the  
359 possibility seems unlikely. An alternative explanation is that there are other kinases  
360 which are responsible for PprB phosphorylation, this situation allows PprB to respond  
361 to other kinds of signals in addition to the RpoS related stress signals. Unfortunately,  
362 we have not found any kinase for PprB till now, a kinase-screening investigation in *P.*  
363 *aeruginosa* is needed in the future.

364 According to evolutionary theory, the induction of genes under a specific  
365 condition should be beneficial for the bacteria, whether through improved fitness or  
366 from enhanced competitive advantage over other organisms. We monitored the fitness  
367 of the wild type and *pprB* mutant strains under CSS in shaking cultures using the  
368 colony-forming unit method. Contrary to our expectation, the *pprB* mutant exhibited  
369 better fitness than the wild type strain did (Fig. 8A). Since biofilm is considered to be  
370 the natural form of existence of *P. aeruginosa*, and according to the previously found  
371 biological filtration effect of biofilm (43), cells in the deep inner regions of biofilm  
372 may encounter CSS as the biofilm grows and thickens. We detected the expression of  
373 both *pprB* and PprB regulated genes in *P. aeruginosa* colony biofilms. All the  
374 observed genes displayed thorough induction after 72 hours of incubation (Fig. 8B),

375 indicating the probable involvement of PprB in biofilm development. Considering the  
376 enhanced cell-cell and cell-surface adhesions found in the PprB-overexpressed strain,  
377 and that the *pprB* mutant strain showed a reduced biofilm formation (24), this  
378 CSS-RpoS-PprB-BapA/Flp/CupE/Tad signaling pathway may help reinforce the  
379 structure of *P. aeruginosa* biofilms.

380

381

382

383

384

385

386

387

388

389

390

391

392

393

394

395

396

397 **Materials and Methods**

398 **Bacterial strains and growth conditions.** The strains and plasmids used in this study  
399 are listed in Table 1. Unless otherwise stated, cells were grown in FAB minimal media  
400 (44) supplemented with 30 mM sodium succinate (FABS) or other carbon sources (i.e.,  
401 30 mM sodium glutamate, 30 mM glucose, 10 mM alpha-Ketoglutaric acid (alfa-KG),  
402 30 mM sodium citrate, 30 mM aspartic acid, or 30 mM sodium acetate) at 37 °C. To  
403 prevent plasmid loss, 30 µg/mL gentamycin was added to media for cultivation of the  
404 strains containing transcriptional reporter plasmids or pJN105-derivative vectors. LB  
405 media was used throughout the DNA cloning experiments. The *Escherichia coli*  
406 Top10 strain was used for standard genetic manipulations.

407

408 **Carbon deprivation experiment of transcriptional reporter strains.** Overnight  
409 cultures of *P. aeruginosa* strains in FABS supplemented with 30 mg/mL gentamycin  
410 (FABSgen) were 100× diluted and grown to the logarithmic phase in FABSgen media.  
411 Cells were then harvested and washed once with FAB and resuspended in FAB + 30  
412 µg/mL gentamycin (FABgen). Next, the suspensions were cultivated for a further 5  
413 hours with shaking. For carbon deprivation in PApprB1 and PApprB2 strains,  
414 overnight cultures were diluted 100× in FABSgen + 0.4% (wt/vol) L-arabinose and  
415 grown to the logarithmic phase before following the same procedures noted above.

416

417 **Acetate and nitrogen starvation stress experiment.** Overnight cultures of *pprB*  
418 transcriptional reporter strains in FABS supplemented with 30 µg/mL gentamycin

419 (FABSgen) were 100× diluted and grown to the logarithmic phase in FABSgen media.

420 For 200 mM acetate stress experiment, cells were then 100× diluted into FABSgen +

421 200 mM acetate and cultivated for 5 hours with shaking. Sfgfp fluorescence of cells

422 was then measured by microscopy as mentioned below. For nitrogen starvation

423 experiment, cells were washed once with and resuspended in the FABSgen medium

424 without ammonium sulfate, and cultivated for 5 hours with shaking before use.

425

426 **Construction of gene deletion or complementary mutants in *P. aeruginosa*.** PCR

427 was used to generate 1000 bp DNA fragments upstream (Up) or downstream (Dn)

428 from the *pprA*, *pprB*, *flp*, *cupE*, and *bap* genes. The primer pairs are listed in Table S1.

429 The Up and Dn DNA fragments for *pprA*, *cupE* and *bap* were ligated together using

430 overlap extension PCR, and then inserted into the pex18gm vector via Gibson

431 assembly. The recombinant plasmids were introduced into *P. aeruginosa* through

432 electroporation, and the deletion mutants were obtained by double selection on LB

433 agar supplemented with gentamycin (30 µg/mL) and NaCl-free LB agar containing 15%

434 sucrose at 37 °C (45). The Up and Dn DNA fragments for *cbrAB*, *pprB*, and *flp* were

435 digested and cloned into pex18ap at HindIII/XbaI site together with *aacC1*. The

436 recombinant plasmids were electroporated into *P. aeruginosa*, deletion mutants were

437 obtained by selection on LB agar supplemented with gentamycin (30 µg/mL)

438 containing 5% sucrose at 37 °C. Then pFLP2 system was used to delete the *aacC1*

439 cassette (46). The miniTn7 system (47) was used to construct the complementary

440 *pprB* and *rpoS* mutants in *P. aeruginosa*. PCR fragments of *pprB* coding sequences

441 and *araC*-P<sub>BAD</sub> were inserted into the miniTn7 vector via Gibson assembly,  
442 generating P<sub>BAD</sub>-*pprB*-Tn7. Then, PCR fragments of the *rpoS* coding sequence,  
443 together with *rpoS* promoter sequence, were inserted into miniTn7 vector via Gibson  
444 assembly, generating *P<sub>rpoS</sub>-rpoS*-Tn7. The resultant plasmids were introduced to the  
445 *pprB* and *rpoS* mutant strains through electroporation, and the transconjugants were  
446 selected on 1.5% LB agar plates supplemented with 30 µg/mL gentamycin. The  
447 gentamycin resistance cassette in the complementary strains was then deleted  
448 according to a standard protocol (46).

449

450 **Construction of transcriptional reporters in *P. aeruginosa*.** The *sfgfp* fusion  
451 plasmid used to measure the promoter activity of multi genes is a derivative of the  
452 vector PUCP20, here named pUCPgfp. *sfgfp*, *cyofp* and terminator fragments were  
453 amplified using PCR and inserted together into pUCP20 via Gibson assembly,  
454 generating PUCPgfp. The resultant genetic organization was  
455 *RNAseIII*-RBS2-*sfgfp*-T<sub>0</sub>T<sub>1</sub>-J23102-RBS2-*cyofp*-T-PUCP20. To construct the  
456 transcriptional fusion plasmids, promoter regions of *pprB*, *flp*, *rcpC*, and *cupE* were  
457 amplified by PCR from the PAO1 genomic DNA. The primer sets are noted in Table  
458 S1. Next, each fragment was cloned into PUCPgfp right before the *RNAseIII* site via  
459 Gibson assembly. The reporter plasmids were introduced into *P. aeruginosa* through  
460 chemical transformation. To construct site mutation transcriptional reporters of *pprB*,  
461 the wild type *pprB* reporter plasmid was used as a template. Two fragments were  
462 amplified: the primer pairs P*pprB*-mut1-F/PUCP20-R and P*pprB*-mut1-R/PUCP20-F

463 were used for RpoS binding site mutation, and *PpprB*-mut2-F/PUCP20-R and *PpprB*-  
464 mut2-R/PUCP20-F were used for PprB binding site mutation. Then, the fragments  
465 were ligated together via Gibson assembly, generating *PpprB*-mutRpoS-PUCPgfp  
466 (*PpprB* mut1-*sfgfp*) and *PpprB*-mutPprB-PUCPgfp (*PpprB* mut2-*sfgfp*) plasmids.  
467 These two plasmids were introduced into *P. aeruginosa* strains through  
468 electroporation. All transconjugants were selected on 1.5% LB agar plates  
469 supplemented with 30 µg/mL gentamycin.

470

#### 471 **Imaging of single cells of different promoter reporter strains and data analysis.**

472 The bacterial culture samples were pipetted out and loaded on a 2% (wt/vol) agarose  
473 FAB pad. Then, the pad was flipped onto a 0.15 mm cover glass so that the bacteria  
474 were sandwiched and lay flat between the agarose pad and the cover glass.  
475 Fluorescent images were acquired by confocal microscopy (IX-81, Olympus),  
476 equipped with a 100× oil objective and an EMCCD camera (Andor iXon897).  
477 Twenty-five image fields of each sample were snapped, from which more than 500  
478 cells were imaged. In each image field, two images were acquired, one SfGFP image  
479 and one CyOFP image. SfGFP and CyOFP were both excited using a 488 nm laser  
480 and the fluorescence were collected through two emission filters, sized at  $524 \pm 25$ nm  
481 and  $607 \pm 25$  nm. Data analysis was conducted using an image processing algorithm  
482 coded using MATLAB. Cell contours were obtained from the CyOFP images, then the  
483 SfGFP fluorescence of cells was measured by counting the mean intensities within  
484 corresponding cell contours in the SfGFP images.

485

486 **RNA-Seq experiment.** Six parallel samples (50 mL each) were prepared, in which  
487 the overnight culture of PAO1 was diluted 50× in FABS media and grown until the  
488 mid-log phase (OD~0.6) at 37 °C under shaking conditions. Three samples were  
489 stored at -80 °C, while the remaining three samples were washed 3 times with FAB  
490 and finally resuspended in FAB of the initial volume. These suspension cultures were  
491 cultivated for a further 6 hours with shaking at 37 °C and stored at -80 °C. The RNA  
492 extraction and sequencing procedures were performed in Guangzhou Huayin Medical  
493 Laboratory Center. Libraries were sequenced on an illumina HiSeq 2000 machine.

494

495 **Aggregation Assay.** Overnight cultures of the *pprB* overexpression (in pJN105) or  
496 wild type strains were diluted 100× in FABSgen media supplemented with 0.02%  
497 (wt/vol) L-arabinose and grown to the mid-log phase (OD ~ 0.6) at 37 °C. To measure  
498 the size of bacterial aggregates, 200 µL of each bacterial suspension were transferred  
499 into a 4-channel-dish (D35C4-20-1-N, Cellvis) and left to stand for 10 minutes at  
500 room temperature. The bacterial aggregates were monitored under a bright-field  
501 microscope equipped with a 60× oil objective. 100 images containing at least 200  
502 bacterial aggregates were obtained every time. Three parallel experiments were  
503 conducted for each sample. The size of aggregates were recorded using ImageJ  
504 software. For Proteinase treatment, 20 µL proteinase K (R7012, Tiangen) was added  
505 to 1 mL bacterial culture at logarithmic phase and incubated for 30 minutes at 37 °C.

506

507 **Microfluidic experiment.** For the microfluidic experiment of the *pprB*  
508 overexpression (in pJN105) strains, the culture conditions were the same as those for  
509 the aggregation assay. For the microfluidic experiment of the PAO1 and *pprB* mutant  
510 strains, the culture condition was the same as those for the carbon starvation  
511 experiment for transcriptional reporter strains, without the addition of gentamycin.  
512 The microchip platform was fabricated with polydimethylsiloxane (PDMS, Sylgard  
513 184, Dow Corning) using standard soft lithography methods (48). Wafers were coated  
514 with SU-8 photoresist (MicroChem Inc., Newton, MA, USA) to form film deposition  
515 of up to 20  $\mu\text{m}$ . The mould contained three parallel microchannels (length, 3 cm;  
516 width, 300  $\mu\text{m}$ ; and height, 20  $\mu\text{m}$ ) and was firmly stuck to a heat-tolerant plastic tray.  
517 Ten milliliters of the PDMS mixture, consisting of cross-linker and prepolymer  
518 PDMS (1:10, wt/wt), were added into the tray and baked at 80  $^{\circ}\text{C}$  for 2 hours. The  
519 structure was then treated with a plasma cleaner (3 min) and bonded to a glass slide  
520 (Thermo Fisher Scientific Inc; length, 55 mm; width, 24 mm; thickness, 0.17 mm). In  
521 total, 0.5 mL of bacterial culture was injected into the channel for each experiment.  
522 The FAB medium was in a 10-mL gas-tight syringe and fluid flow was driven by a  
523 syringe pump (Harvard Apparatus, Holliston, Phd2000).

524

525 **Colony-forming units measurement.** *P. aeruginosa* cultures cultivated under CSS  
526 for 0, 6, 12, and 36 hours were diluted up to 5000-fold with FAB medium, and plated  
527 in triplicate onto LB agar plates. Colonies were counted after a 24-hour incubation at  
528 37  $^{\circ}\text{C}$ .



529

530 **Colony biofilm experiment.** *pprB*, *rcpC*, *flp*, and *cupE* reporter strains of wild type *P.*  
531 *aeruginosa* were grown to the logarithmic phase in FAB medium containing 30 mM  
532 succinate and 30 µg/mL gentamycin, then 2 µL bacterial culture were gently dropped  
533 onto 1.5% agar plates containing the same medium. After the liquid on the culture  
534 plate evaporated, plates were incubated upside down at 37 °C for 6, 12, 24, 48, and 72  
535 hours. Cells were scratched from the surface of biofilm colonies and resuspended in  
536 FAB medium before undergoing fluorescence measurement via microscopy.

537

#### 538 **ACKNOWLEDGMENTS**

539

540 We thank Kangming Duan for providing the *rpoS* mutant strain. We thank J.D. Shrout  
541 for providing the PAO1 wild type and *lasRrhIR* mutant strains. This work was  
542 supported by The National Natural Science Foundation of China (31700087,  
543 21774117 and 31700745) and the Fundamental Research Funds for the Central  
544 Universities (WK3450000003) supported this work.

545

546 We were responsible for performing the study as follows: conceptualization, Lei Ni  
547 and Fan Jin; methodology, Wenhui Chen, Congcong Wang, Aiguo Xia, Rongrong  
548 Zhang, Lei Ni; investigation, Congcong Wang, Lei Ni, Fan Jin; writing— original  
549 draft—Lei Ni; writing—review and editing—Shuai Yang, Fan Jin;

550

551 **Reference**

- 552 1. Driscoll JA, Brody SL, Kollef MH. 2007. The epidemiology, pathogenesis and treatment  
553 of *Pseudomonas aeruginosa* infections. *Drugs* 67:351-368.
- 554 2. Gellatly SL, Hancock REW. 2013. *Pseudomonas aeruginosa*: new insights into  
555 pathogenesis and host defenses. *Pathogens and Disease* 67:159-173.
- 556 3. Hauser AR. 2009. The type III secretion system of *Pseudomonas aeruginosa*: infection by  
557 injection. *Nature Reviews Microbiology* 7:654-665.
- 558 4. Liang HH, Deng X, Li XF, Ye Y, Wu M. 2014. Molecular mechanisms of master regulator  
559 VqsM mediating quorum-sensing and antibiotic resistance in *Pseudomonas aeruginosa*.  
560 *Nucleic Acids Research* 42:10307-10320.
- 561 5. Breidenstein EBM, de la Fuente-Nunez C, Hancock REW. 2011. *Pseudomonas*  
562 *aeruginosa*: all roads lead to resistance. *Trends in Microbiology* 19:419-426.
- 563 6. Lister PD, Wolter DJ, Hanson ND. 2009. Antibacterial-Resistant *Pseudomonas*  
564 *aeruginosa*: Clinical Impact and Complex Regulation of Chromosomally Encoded  
565 Resistance Mechanisms. *Clinical Microbiology Reviews* 22:582-+.
- 566 7. Malhotra S, Limoli DH, English AE, Parsek MR, Wozniak DJ. 2018. Mixed Communities  
567 of Mucoïd and Nonmucoïd *Pseudomonas aeruginosa* Exhibit Enhanced Resistance to  
568 Host Antimicrobials. *MBio* 9.
- 569 8. Reichhardt C, Wong C, Passos da Silva D, Wozniak DJ, Parsek MR. 2018. CdrA  
570 Interactions within the *Pseudomonas aeruginosa* Biofilm Matrix Safeguard It from  
571 Proteolysis and Promote Cellular Packing. *MBio* 9.
- 572 9. Tseng BS, Reichhardt C, Merrihew GE, Araujo-Hernandez SA, Harrison JJ, MacCoss MJ,

- 573 Parsek MR. 2018. A Biofilm Matrix-Associated Protease Inhibitor Protects *Pseudomonas*  
574 *aeruginosa* from Proteolytic Attack. *MBio* 9.
- 575 10. Costerton JW, Stewart PS, Greenberg EP. 1999. Bacterial biofilms: A common cause of  
576 persistent infections. *Science* 284:1318-1322.
- 577 11. Hall-Stoodley L, Costerton JW, Stoodley P. 2004. Bacterial biofilms: From the natural  
578 environment to infectious diseases. *Nature Reviews Microbiology* 2:95-108.
- 579 12. Flemming H-C, Wingender J. 2010. The biofilm matrix. *Nature Reviews Microbiology*  
580 8:623-633.
- 581 13. Yu S, Wei Q, Zhao T, Guo Y, Ma LZ. 2016. A Survival Strategy for *Pseudomonas*  
582 *aeruginosa* That Uses Exopolysaccharides To Sequester and Store Iron To Stimulate  
583 Psl-Dependent Biofilm Formation. *Applied and Environmental Microbiology*  
584 82:6403-6413.
- 585 14. Wei Q, Ma LYZ. 2013. Biofilm Matrix and Its Regulation in *Pseudomonas aeruginosa*.  
586 *International Journal of Molecular Sciences* 14:20983-21005.
- 587 15. Flemming H-C, Neu TR, Wozniak DJ. 2007. The EPS matrix: The "House of Biofilm  
588 cells". *Journal of Bacteriology* 189:7945-7947.
- 589 16. Vu B, Chen M, Crawford RJ, Ivanova EP. 2009. Bacterial Extracellular Polysaccharides  
590 Involved in Biofilm Formation. *Molecules* 14:2535-2554.
- 591 17. Colvin KM, Gordon VD, Murakami K, Borlee BR, Wozniak DJ, Wong GCL, Parsek MR.  
592 2011. The Pel Polysaccharide Can Serve a Structural and Protective Role in the Biofilm  
593 Matrix of *Pseudomonas aeruginosa*. *Plos Pathogens* 7.
- 594 18. Jennings LK, Storek KM, Ledvina HE, Coulon C, Marmont LS, Sadovskaya I, Secor PR,

- 595 Tseng BS, Scian M, Filloux A, Wozniak DJ, Howell PL, Parsek MR. 2015. Pel is a  
596 cationic exopolysaccharide that cross-links extracellular DNA in the *Pseudomonas*  
597 *aeruginosa* biofilm matrix. *Proceedings of the National Academy of Sciences of the*  
598 *United States of America* 112:11353-11358.
- 599 19. Wang S, Liu X, Liu H, Zhang L, Guo Y, Yu S, Wozniak DJ, Ma LZ. 2015. The  
600 exopolysaccharide Psl-eDNA interaction enables the formation of a biofilm skeleton in  
601 *Pseudomonas aeruginosa*. *Environmental Microbiology Reports* 7:330-340.
- 602 20. Yu S, Su T, Wu H, Liu S, Wang D, Zhao T, Jin Z, Du W, Zhu M-J, Chua SL, Yang L, Zhu  
603 D, Gu L, Ma LZ. 2015. PslG, a self-produced glycosyl hydrolase, triggers biofilm  
604 disassembly by disrupting exopolysaccharide matrix. *Cell Research* 25:1352-1367.
- 605 21. Zhao K, Tseng BS, Beckerman B, Jin F, Gibiansky ML, Harrison JJ, Luijten E, Parsek  
606 MR, Wong GCL. 2013. Psl trails guide exploration and microcolony formation in  
607 *Pseudomonas aeruginosa* biofilms. *Nature* 497:388-+.
- 608 22. de Bentzmann S, Giraud C, Bernard CS, Calderon V, Ewald F, Plesiat P, Nguyen C,  
609 Grunwald D, Attree I, Jeannot K, Fauvarque MO, Bordi C. 2012. Unique Biofilm  
610 Signature, Drug Susceptibility and Decreased Virulence in *Drosophila* through the  
611 *Pseudomonas aeruginosa* Two-Component System PprAB. *Plos Pathogens* 8:15.
- 612 23. Wang YP, Ha U, Zeng L, Jin SG. 2003. Regulation of membrane permeability by a  
613 two-component regulatory system in *Pseudomonas aeruginosa*. *Antimicrobial Agents and*  
614 *Chemotherapy* 47:95-101.
- 615 24. Romero M, Silistre H, Lovelock L, Wright VJ, Chan K-G, Hong K-W, Williams P,  
616 Camara M, Heeb S. 2018. Genome-wide mapping of the RNA targets of the

- 617 *Pseudomonas aeruginosa* riboregulatory protein RsmN. *Nucleic Acids Research*  
618 46:6823-6840.
- 619 25. Giraud C, Bernard CS, Calderon V, Yang L, Filloux A, Molin S, Fichant G, Bordi C, de  
620 Bentzmann S. 2011. The PprA-PprB two-component system activates CupE, the first  
621 non-archetypal *Pseudomonas aeruginosa* chaperone-usher pathway system assembling  
622 fimbriae. *Environmental Microbiology* 13:666-683.
- 623 26. Bernard CS, Bordi C, Termine E, Filloux A, de Bentzmann S. 2009. Organization and  
624 PprB-Dependent Control of the *Pseudomonas aeruginosa* tad Locus, Involved in Flp Pilus  
625 Biology. *Journal of Bacteriology* 191:1961-1973.
- 626 27. Motherway MOC, Zomer A, Leahy SC, Reunanen J, Bottacini F, Claesson MJ, O'Brien F,  
627 Flynn K, Casey PG, Munoz JAM, Kearney B, Houston AM, O'Mahony C, Higgins DG,  
628 Shanahan F, Palva A, de Vos WM, Fitzgerald GF, Ventura M, O'Toole PW, van Sinderen  
629 D. 2011. Functional genome analysis of *Bifidobacterium breve* UCC2003 reveals type  
630 IVb tight adherence (Tad) pili as an essential and conserved host-colonization factor.  
631 *Proceedings of the National Academy of Sciences of the United States of America*  
632 108:11217-11222.
- 633 28. Tomich M, Planet PJ, Figurski DH. 2007. The tad locus: postcards from the widespread  
634 colonization island. *Nature Reviews Microbiology* 5:363-375.
- 635 29. Nishijyo T, Haas D, Itoh Y. 2001. The CbrA-CbrB two-component regulatory system  
636 controls the utilization of multiple carbon and nitrogen sources in *Pseudomonas*  
637 *aeruginosa*. *Molecular Microbiology* 40:917-931.
- 638 30. Sonnleitner E, Blaesi U. 2014. Regulation of Hfq by the RNA CrcZ in *Pseudomonas*

- 639 aeruginosa Carbon Catabolite Repression. Plos Genetics 10.
- 640 31. Jorgensen F, Bally M, Chapon-Herve V, Michel G, Lazdunski A, Williams P, Stewart G.
- 641 1999. RpoS-dependent stress tolerance in *Pseudomonas aeruginosa*. Microbiology-Uk
- 642 145:835-844.
- 643 32. Suh SJ, Silo-Suh L, Woods DE, Hassett DJ, West SEH, Ohman DE. 1999. Effect of rpoS
- 644 mutation on the stress response and expression of virulence factors in *Pseudomonas*
- 645 *aeruginosa*. Journal of Bacteriology 181:3890-3897.
- 646 33. Schuster M, Hawkins AC, Harwood CS, Greenberg EP. 2004. The *Pseudomonas*
- 647 *aeruginosa* RpoS regulon and its relationship to quorum sensing. Molecular Microbiology
- 648 51:973-985.
- 649 34. Schellhorn HE, Stones VL. 1992. REGULATION OF KATF AND KATE IN
- 650 *ESCHERICHIA-COLI* K-12 BY WEAK ACIDS. Journal of Bacteriology
- 651 174:4769-4776.
- 652 35. Kabir MS, Sagara T, Oshima T, Kawagoe Y, Mori H, Tsunedomi R, Yamada M. 2004.
- 653 Effects of mutations in the rpoS gene on cell viability and global gene expression under
- 654 nitrogen starvation in *Escherichia coli*. Microbiology-Sgm 150:2543-2553.
- 655 36. Potrykus K, Cashel M. 2008. (p)ppGpp: Still Magical?, p 35-51, Annual Review of
- 656 Microbiology, vol 62.
- 657 37. Haseltine WA, Block R. 1973. SYNTHESIS OF GUANOSINE TETRAPHOSPHATE
- 658 AND PENTAPHOSPHATE REQUIRES PRESENCE OF A CODON-SPECIFIC,
- 659 UNCHARGED TRANSFER RIBONUCLEIC-ACID IN ACCEPTOR SITE OF
- 660 RIBOSOMES - (STRINGENT CONTROL PPGPP (MSI) AND PPPGPP (MSII))

- 661           PROTEIN SYNTHESIS ESCHERICHIA-COLI). Proceedings of the National Academy  
662           of Sciences of the United States of America 70:1564-1568.
- 663   38.    Zhang T, Zhu J, Wei S, Luo Q, Li L, Li S, Tucker A, Shao H, Zhou R. 2016. The roles of  
664           RelA/(p)ppGpp in glucose-starvation induced adaptive response in the zoonotic  
665           Streptococcus suis. Scientific Reports 6.
- 666   39.    Battesti A, Majdalani N, Gottesman S. 2011. The RpoS-Mediated General Stress  
667           Response in Escherichia coli, p 189-213. *In* Gottesman S, Harwood CS (ed), Annual  
668           Review of Microbiology, Vol 65, vol 65.
- 669   40.    Capra EJ, Laub MT. 2012. Evolution of Two-Component Signal Transduction Systems, p  
670           325-347. *In* Gottesman S, Harwood CS, Schneewind O (ed), Annual Review of  
671           Microbiology, Vol 66, vol 66.
- 672   41.    Mitrophanov AY, Groisman EA. 2008. Signal integration in bacterial two-component  
673           regulatory systems. Genes & Development 22:2601-2611.
- 674   42.    West AH, Stock AM. 2001. Histidine kinases and response regulator proteins in  
675           two-component signaling systems. Trends in Biochemical Sciences 26:369-376.
- 676   43.    Pang CM, Liu W-T. 2006. Biological filtration limits carbon availability and affects  
677           downstream biofilm formation and community structure. Applied and Environmental  
678           Microbiology 72:5702-5712.
- 679   44.    Heydorn A, Nielsen AT, Hentzer M, Sternberg C, Givskov M, Ersboll BK, Molin S. 2000.  
680           Quantification of biofilm structures by the novel computer program COMSTAT.  
681           Microbiology-Sgm 146:2395-2407.
- 682   45.    Hmelo LR, Borlee BR, Almlblad H, Love ME, Randall TE, Tseng BS, Lin C, Irie Y,

- 683 Storek KM, Yang JJ, Siehnel RJ, Howell PL, Singh PK, Tolker-Nielsen T, Parsek MR,  
684 Schweizer HP, Harrison JJ. 2015. Precision-engineering the *Pseudomonas aeruginosa*  
685 genome with two-step allelic exchange. *Nature Protocols* 10:1820-1841.
- 686 46. Hoang TT, Karkhoff-Schweizer RR, Kutchma AJ, Schweizer HP. 1998. A  
687 broad-host-range Flp-FRT recombination system for site-specific excision of  
688 chromosomally-located DNA sequences: application for isolation of unmarked  
689 *Pseudomonas aeruginosa* mutants. *Gene* 212:77-86.
- 690 47. Choi KH, Schweizer HP. 2006. Mini-Tn7 insertion in bacteria with single attTn7 sites:  
691 example *Pseudomonas aeruginosa*. *Nature Protocols* 1:153-161.
- 692 48. Rongrong Z, Aiguo X, Lei N, Feixuan L, Zhenyu J, Shuai Y, Fan J. 2017. Strong Shear  
693 Flow Persister Bacteria Resist Mechanical Washings on the Surfaces of Various Polymer  
694 Materials. *Advanced Biosystems* 1:1700161 (7 pp.)-1700161 (7 pp.).

695

696

697

698

699

700

701

702

703

704



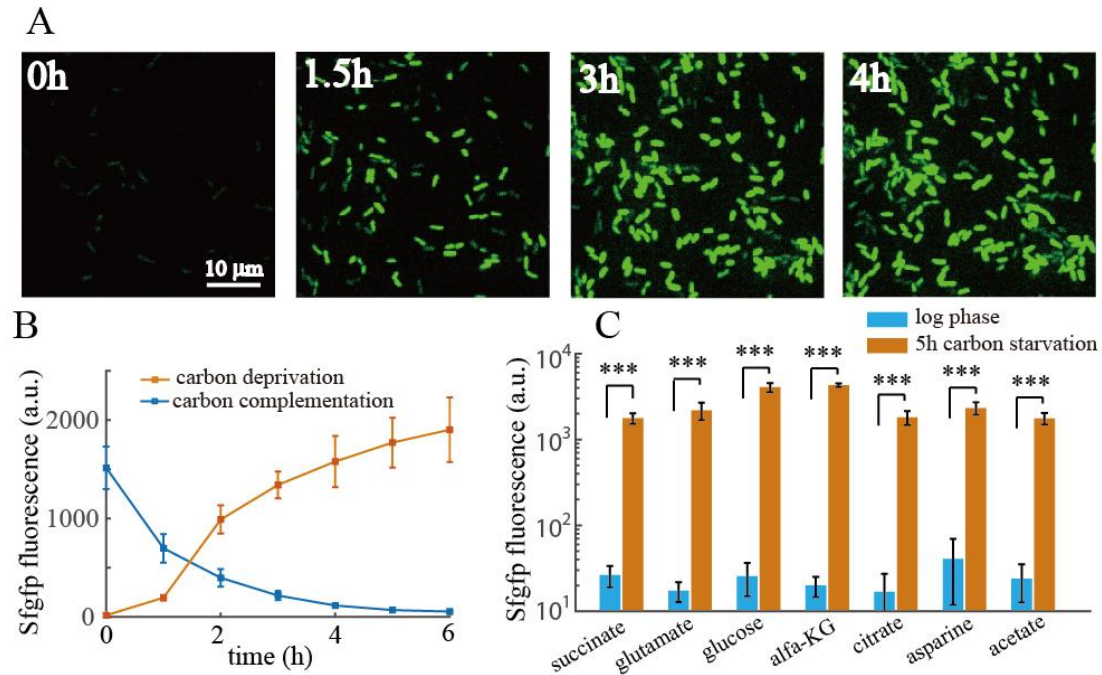

705

706

707 **Figure 1: *flp* transcription is induced under CSS.**

708 (A), Sfgfp time-lapse imaging of *flp* transcriptional reporter cells after carbon

709 deprivation. (B), Resulting expression values of *flp* transcriptional reporter over time

710 after carbon deprivation (blue line) or *flp* expression over time after carbon

711 complementation of 4-hour CSS pretreated cells (orange line). (C), Expression values

712 of *flp* transcriptional reporter using different type of carbon sources at logarithmic

713 phase or after 5-hour carbon deprivation. Statistical analysis used pairwise strain

714 comparisons (t-test). \*\*\*P < 0.001.

715

716

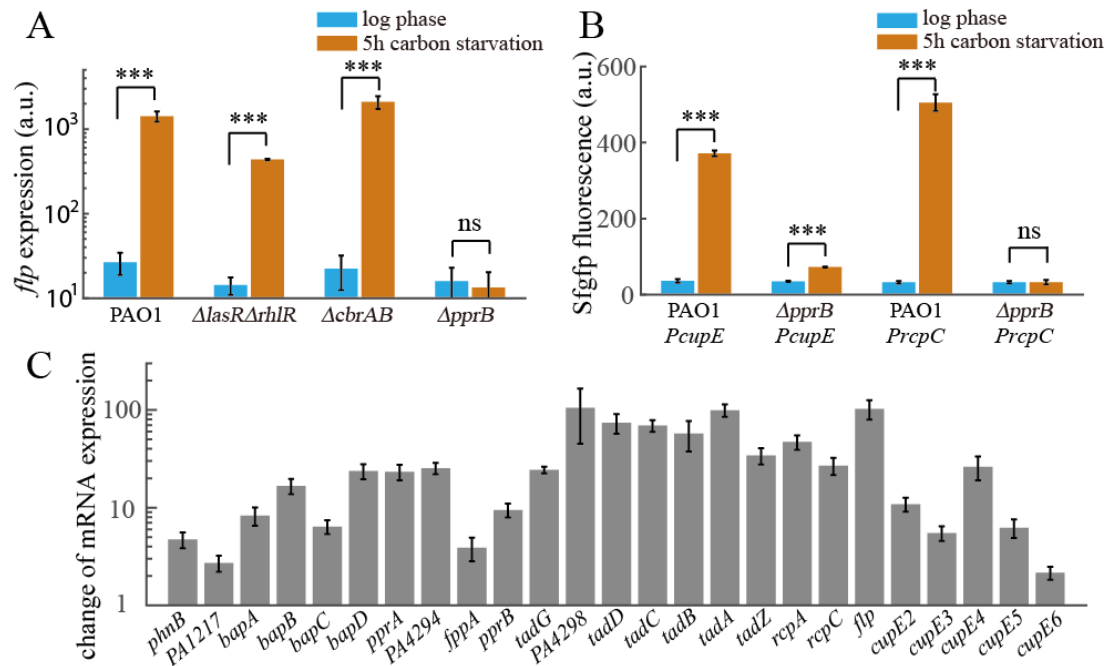

717

718 **Figure 2: PprB-regulated genes are induced under CSS.** (A), Expression values of

719 *flp* transcriptional reporter in different mutants of *P. aeruginosa* at logarithmic phase

720 or after 5-hour carbon deprivation. (B). Expression values of *cupE* or *rcpC*

721 transcriptional reporters in wild type or *pprB* mutant strains at logarithmic phase or

722 after 5-hour carbon deprivation. (C). RNA-seq fold change values of mRNA levels of

723 PprB-regulated genes in response to CSS. All data are from three independent

724 experiments and shown as the mean  $\pm$  s.d. Statistical analysis used pairwise strain

725 comparisons (t-test). \*\*\* $P < 0.001$ ; ns, non-significant.

726

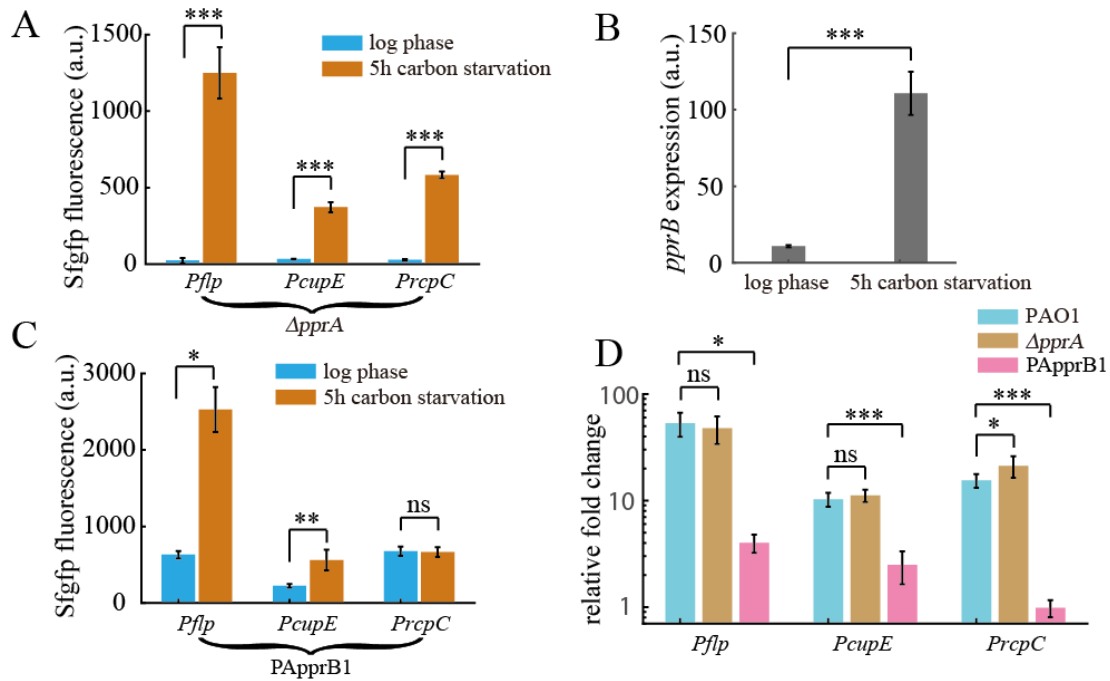

727

728 **Figure 3: Increased expression of PprB under CSS contributes primarily to the**

729 **transcriptional induction of PprB-regulated genes.** (A), Expression values of *flp*,

730 *cupE* or *rcpC* transcriptional reporters in *pprA* mutant strain at logarithmic phase or

731 after 5-hour carbon deprivation. (B), Expression values of *pprB* transcriptional

732 reporters in wild type strain at logarithmic phase or after 5-hour carbon deprivation.

733 (C), Expression values of *flp*, *cupE* or *rcpC* transcriptional reporters in PApprB1

734 (PprB was constitutively overexpressed) strain at logarithmic phase or after 5-hour

735 carbon deprivation. (D), Fold change values of *flp*, *cupE* or *rcpC* expression upon

736 5-hour carbon deprivation in wild type, *pprA* mutant or PApprB1 strains. All data are

737 from three independent experiments and shown as the mean  $\pm$  s.d. Statistical analysis

738 used pairwise strain comparisons (t-test). \* $P < 0.05$ ; \*\* $P < 0.01$ ; \*\*\* $P < 0.001$ ; ns,

739 non-significant.

740

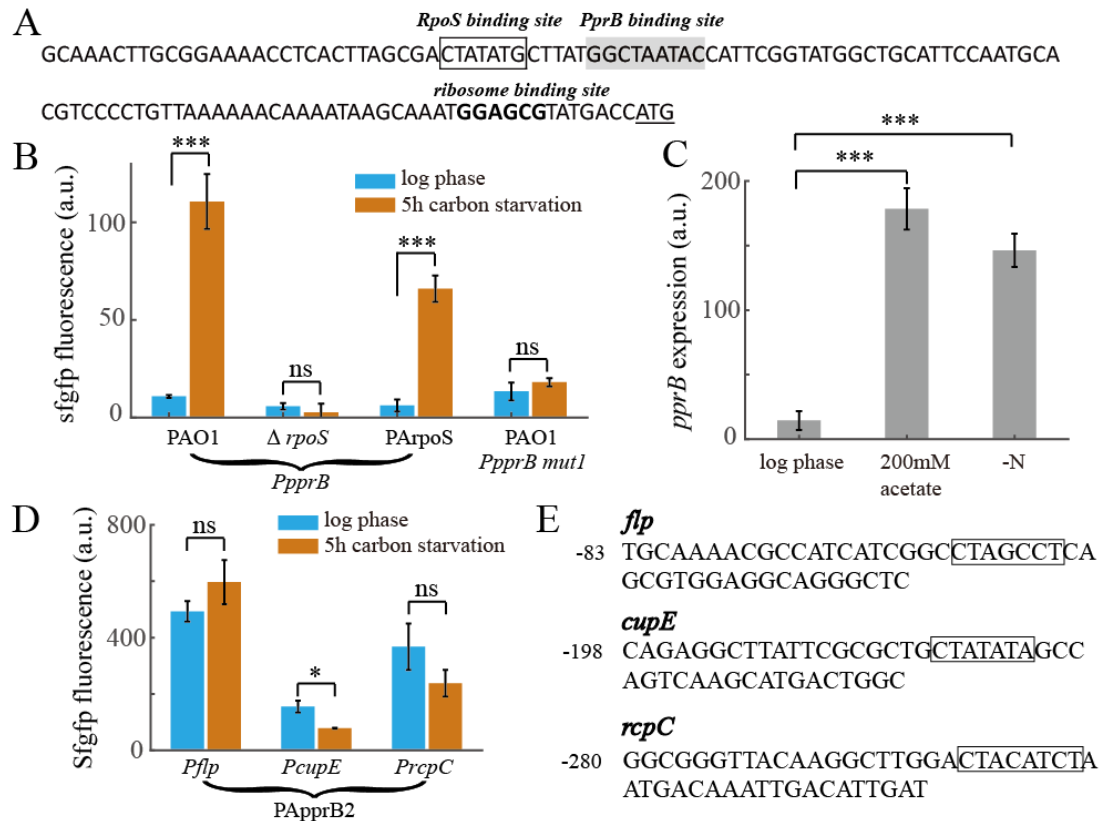

741

742 **Figure 4: Increased expression of PprB under CSS is controlled by RpoS.** (A),

743 Promoter region of the *pprB* gene. Putative RpoS or PprB binding sites are framed or

744 greyed. The ribosome binding site is shown in boldface and the translational start

745 codon is underlined. (B), Expression values of *pprB*, or *PpprB mut1* (RpoS binding

746 sequence CTATATG was mutated to GGGTATG) transcriptional reporters in the wild

747 type or *rpoS* mutant or PArpoS ( $\Delta rpoS$ , *rpoS* complement at genomic attTn7 site)

748 strains at logarithmic phase or after 5-hour carbon deprivation. (C), Expression values

749 of *pprB* transcriptional reporters in wild type strain at logarithmic phase or after

750 5-hour 200 mM acetate stress or 5-hour nitrogen starvation stress. (D), Expression

751 values of *flp*, *cupE* or *rcpC* transcriptional reporters in PApprB2 ( $\Delta rpoS$ , PprB

752 overexpression) strain at logarithmic phase or after 5-hour carbon deprivation. (E),

753 Promoter regions of the *cupE*, *rcpC* and *flp* genes. Putative RpoS binding sites are

754 framed. Data in B, C, and D are from three independent experiments and shown as the  
755 mean  $\pm$  s.d. Statistical analysis used pairwise strain comparisons (t-test). \*P < 0.05;  
756 \*\*\*P < 0.001; ns, non-significant.

757

758

759

760

761

762

763

764

765

766

767

768

769

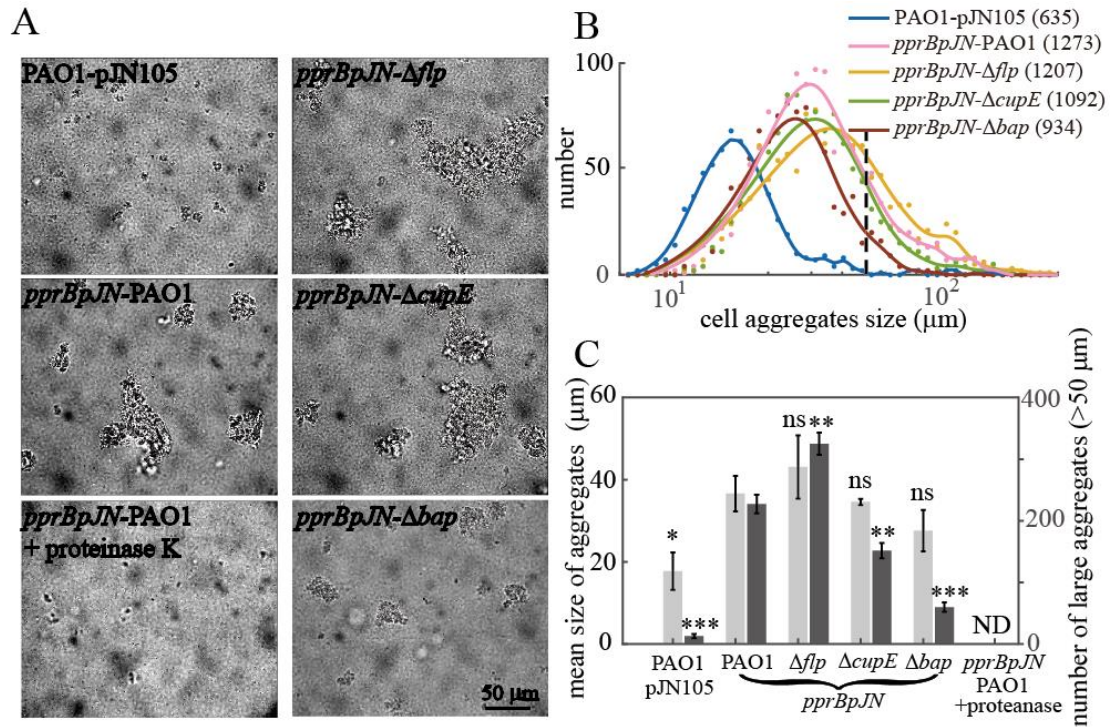

770

771 **Figure 5: PprB overexpression enhances CCA in *P. aeruginosa*.** (A), Bright field  
772 images of the logarithmic bacterial cultures of indicated strains. (B), Size distribution  
773 curves of cell aggregates of indicated strains, total numbers of cell aggregates counted  
774 for each strain are labelled in the brackets behind strain names. Data are presented on  
775 Logarithmic scale. The distribution curves are the smoothing result of original data  
776 points using Smoothing Spline method. The black dashed line indicates the position  
777 where cell aggregate size equals 50 μm. (C), Mean size of cell aggregates (light gray)  
778 and number of large aggregates (dark gray, cell aggregates size > 50 μm) in indicated  
779 strains. Mean aggregate sizes of samples are from three independent experiments and  
780 shown as the mean ± s.d. Error of big aggregates numbers are estimated from Poisson  
781 counts. ND, not detected. Statistical analysis used pairwise comparisons between  
782 corresponding data in the *pprBpJN-PAO1* and other strains (t-test). \*P < 0.05; \*\*P <  
783 0.01; \*\*\*P < 0.001; ns, non-significant.

784

785

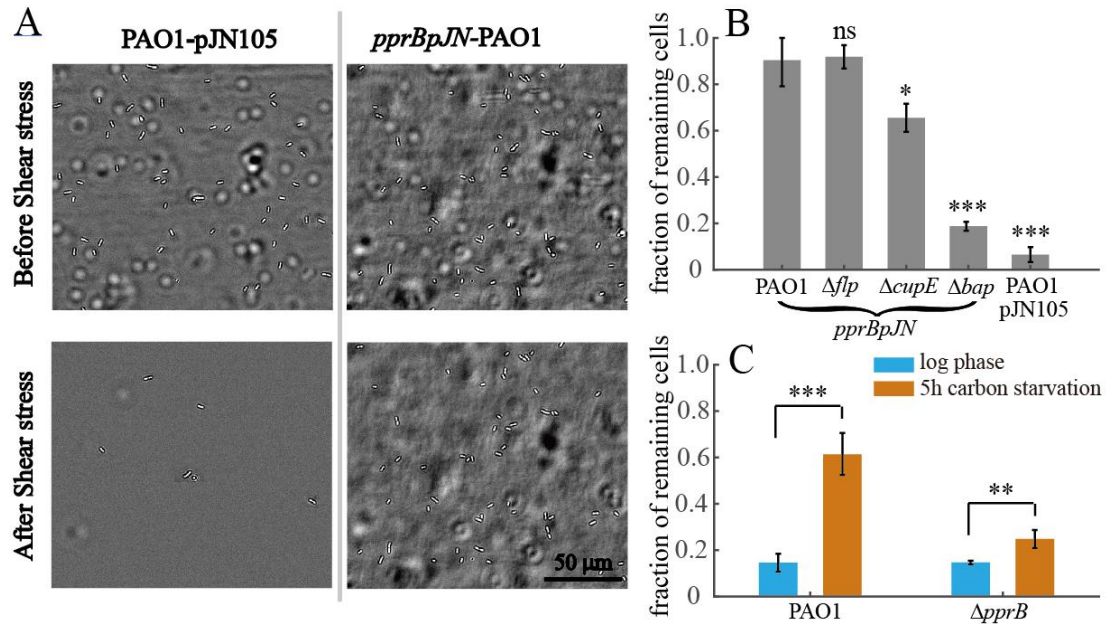

786

787 **Figure 6: PprB overexpression enhances CSA in *P. aeruginosa*.** (A), Bright field

788 images of the wild type or PprB overexpression cells in microfluidic channels before

789 and after exposing to 5-min shear stress (70 Pa). (B), Fraction of remaining cells on

790 surface after exposing to 5-min shear stress (70 Pa). (C), Fraction of remaining cells

791 on surface of wild type or *pprB* mutant strains after exposing to 5-min shear stress (70

792 Pa), cells were from the logarithmic phase or treated with 5-hour carbon starvation.

793 Data in B and C are from three independent experiments and shown as the mean  $\pm$  s.d.

794 Statistical analysis used pairwise strain comparisons (t-test). \* $P < 0.05$ ; \*\* $P < 0.01$ ;

795 \*\*\* $P < 0.001$ ; ns, non-significant.

796

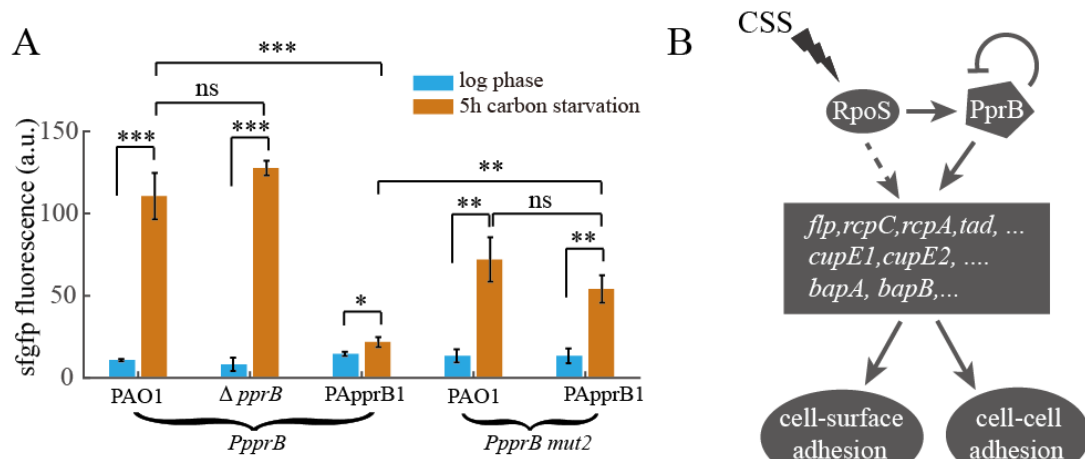

797

798 **Figure 7: PprB negatively regulates the transcription of itself, and model of CSS**

799 **responses of PprB-regulated genes through RpoS.** (A), Expression values of *pprB*

800 or *PpprB mut2* (PprB binding sequence GGCTAATAC was mutated to

801 GGCGGGTAC) transcriptional reporters in wild type or *pprB* mutant or PApprB1

802 (PprB was constitutively overexpressed) strains at logarithmic phase or after 5-hour

803 carbon deprivation. Data are from three independent experiments and shown as the

804 mean  $\pm$  s.d. (B), Schematic representation of the RpoS-PprB-Flp/CupE/Bap/Tad

805 system and its signaling cascade to CSS. CSS induces the expression of

806 PprB-regulated genes through triggering the expression of PprB. RpoS mediates the

807 CSS signal induction of PprB transcription. Expression of PprB-regulated genes

808 enhances bacterial CCA and CSA. PprB negatively regulates the transcription of itself.

809 Statistical analysis used pairwise strain comparisons (t-test). \*P < 0.05; \*\*P < 0.01;

810 \*\*\*P < 0.001.

811



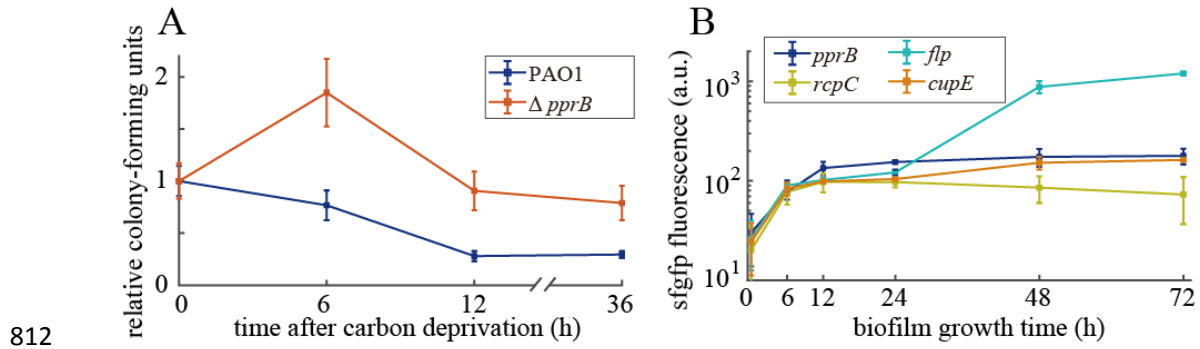

812  
813 **Figure 8:** (A), Relative colony-forming units of wild type and *pprB* mutant cells after  
814 carbon deprivation for 0, 6, 12 and 36 hours in shaking conditions at 37 °C.  
815 Colony-forming unit data of each strain were normalized by data at 0 hour. (B), Time  
816 dependent expression curves of *pprB*, *flp*, *rcpC* or *cupE* genes in the wild type cells  
817 grown in colony biofilms at 37 °C. Data are from three independent experiments and  
818 shown as the mean  $\pm$  s.d.

819

820

821

822

823

824

825

826

827

828

829

830

831 **Table 1: Strains and Plasmids used in this study**

| Strains or plasmids                 | description                                                                                                                                                                                                                                                   | origin                 |
|-------------------------------------|---------------------------------------------------------------------------------------------------------------------------------------------------------------------------------------------------------------------------------------------------------------|------------------------|
| <b><i>E. coli</i> strain</b>        |                                                                                                                                                                                                                                                               |                        |
| Top10                               | F <sup>-</sup> , <i>mcrA</i> , ( <i>mrr</i> ; <i>hsdRMS-mcrBC</i> ), 80 <i>lacZ</i> M15 <i>lacX74</i> ,<br><i>recA1</i> , <i>araD139</i> , ( <i>ara-leu</i> )7697, <i>galU</i> , <i>galK</i> , <i>rpsL</i> (Str <sup>R</sup> ),<br><i>endA1</i> , <i>nupG</i> | Invitrogen             |
| <b><i>P. aeruginosa</i> strains</b> |                                                                                                                                                                                                                                                               |                        |
| PAO1                                | Wild-type strain                                                                                                                                                                                                                                              | J.D. Shrout            |
| $\Delta pprB$                       | nonpolar <i>pprB</i> deletion in PAO1                                                                                                                                                                                                                         | This study             |
| $\Delta pprA$                       | nonpolar <i>pprA</i> deletion in PAO1                                                                                                                                                                                                                         | This study             |
| $\Delta rpoS$                       | nonpolar <i>rpoS</i> deletion in PAO1                                                                                                                                                                                                                         | Kangming<br>Duan group |
| $\Delta flp$                        | nonpolar <i>flp</i> deletion in PAO1                                                                                                                                                                                                                          | This study             |
| $\Delta cupE$                       | nonpolar <i>cupE</i> deletion in PAO1                                                                                                                                                                                                                         | This study             |
| $\Delta bapA$                       | nonpolar <i>bapA</i> deletion in PAO1                                                                                                                                                                                                                         | This study             |
| $\Delta lasR\Delta rhIR$            | nonpolar <i>lasR</i> and <i>rhIR</i> deletion in PAO1                                                                                                                                                                                                         | J.D. Shrout            |
| $\Delta cbrA\Delta cbrB$            | nonpolar <i>cbrA</i> and <i>cbrB</i> deletion in PAO1                                                                                                                                                                                                         | This study             |
| PApprB1                             | $\Delta pprB$ , <i>araC</i> -P <sub>BAD</sub> - <i>pprB</i> -miniTn7                                                                                                                                                                                          | This study             |
| PApprB2                             | $\Delta rpoS$ , <i>araC</i> -P <sub>BAD</sub> - <i>pprB</i> -miniTn7                                                                                                                                                                                          | This study             |
| PArpoS                              | $\Delta rpoS$ , <i>PrpoS</i> - <i>rpoS</i> -miniTn7                                                                                                                                                                                                           | This study             |
| PAO1 pJN105                         | PAO1 strain containing pJN105 void vector, Gm <sup>R</sup>                                                                                                                                                                                                    | This study             |
| <i>pprB</i> pJN-PAO1                | PAO1 strain containing <i>pprB</i> -pJN105, <i>pprB</i> expression under                                                                                                                                                                                      | This study             |

|                         |                                                                                                                                                                             |            |
|-------------------------|-----------------------------------------------------------------------------------------------------------------------------------------------------------------------------|------------|
|                         | the control of arabinose concentration , Gm <sup>R</sup>                                                                                                                    |            |
| <i>pprBpJN-Δflp</i>     | <i>Δflp</i> strain containing <i>pprB</i> -pJN105, Gm <sup>R</sup>                                                                                                          | This study |
| <i>pprBpJN-ΔcupE</i>    | <i>ΔcupE</i> strain containing <i>pprB</i> -pJN105, Gm <sup>R</sup>                                                                                                         | This study |
| <i>pprBpJN-ΔbapA</i>    | <i>ΔbapA</i> strain containing <i>pprB</i> -pJN105, Gm <sup>R</sup>                                                                                                         | This study |
| <b>Plasmids</b>         |                                                                                                                                                                             |            |
| PUCPgfps                | Cloning vector for transcriptional reporter,<br><i>RNAseIII</i> -RBS2- <i>sfGfp</i> -T <sub>0</sub> T <sub>1</sub> -J23102-RBS2- <i>cyoFp</i> -T-PUCP20,<br>Gm <sup>R</sup> | This study |
| <i>Pflp</i> -PUCPgfps   | Transcriptional reporter plasmid of <i>flp</i> , Gm <sup>R</sup>                                                                                                            | This study |
| <i>PcupE</i> -PUCPgfps  | Transcriptional reporter plasmid of <i>cupE1</i> , Gm <sup>R</sup>                                                                                                          | This study |
| <i>PrcpC</i> -PUCPgfps  | Transcriptional reporter plasmid of <i>rcpC</i> , Gm <sup>R</sup>                                                                                                           | This study |
| <i>PpprB</i> -PUCPgfps  | Transcriptional reporter plasmid of <i>pprB</i> , Gm <sup>R</sup>                                                                                                           | This study |
| <i>PpprB mut1</i>       | Transcriptional reporter plasmid of <i>pprB</i> , with RpoS binding site mutated from CTATATG to GGGTATG, Gm <sup>R</sup>                                                   | This study |
| <i>PpprB mut2</i>       | Transcriptional reporter plasmid of <i>pprB</i> , with PprB binding site mutated from GGCTAATAC to GGCGGGTAC, Gm <sup>R</sup>                                               | This study |
| pex18ap                 | oriT <sup>+</sup> sacB <sup>+</sup> ; gene replacement vector with MCS from pUC18; Ap <sup>R</sup>                                                                          | (46)       |
| pex18gm                 | oriT <sup>+</sup> sacB <sup>+</sup> ; gene replacement vector with MCS from pUC18; Gm <sup>R</sup>                                                                          | (46)       |
| pFLP2                   | sacB <sup>+</sup> ; Flp recombinase-expressing bhr vector; Ap <sup>R</sup>                                                                                                  | (46)       |
| <i>flp</i> -gen-pex18ap | In-frame deletion of <i>flp</i> cloned into HindIII/XbaI sites of                                                                                                           | This study |

|                                                          |                                                                                                                                               |            |
|----------------------------------------------------------|-----------------------------------------------------------------------------------------------------------------------------------------------|------------|
|                                                          | pex18ap; Ap <sup>R</sup> , Gm <sup>R</sup>                                                                                                    |            |
| <i>pprB</i> -gen-pex18ap                                 | In-frame deletion of <i>pprB</i> cloned into HindIII/XbaI sites of pex18ap; Ap <sup>R</sup> , Gm <sup>R</sup>                                 | This study |
| <i>cupE</i> -pex18gm                                     | In-frame deletion of <i>cupE</i> operon ( <i>cupE1-cupE6</i> ) cloned into pex18gm; Gm <sup>R</sup>                                           | This study |
| <i>bapA</i> -pex18gm                                     | In-frame deletion of <i>bap</i> operon ( <i>bapA-bapD</i> ) cloned into pex18gm; Gm <sup>R</sup>                                              | This study |
| <i>pprA</i> -pex18gm                                     | In-frame deletion of <i>flp</i> cloned into pex18gm; Gm <sup>R</sup>                                                                          | This study |
| <i>araC</i> -P <sub>BAD</sub> - <i>pprB</i> -mi<br>niTn7 | <i>pprB</i> complementary plasmid for chromosomal insertion at attTn7 site, <i>pprB</i> expression is controlled by P <sub>BAD</sub> promoter | This study |
| <i>P<sub>rpoS</sub></i> - <i>rpoS</i> -miniTn7           | <i>rpoS</i> complementary plasmid for chromosomal insertion at attTn7 site, <i>rpoS</i> expression is controlled by its own promoter          | This study |
| <i>pprB</i> -pJN105                                      | <i>pprB</i> overexpression vector in pJN105, <i>pprB</i> expression is controlled by P <sub>BAD</sub> promoter                                | This study |

832
